# Supplementary material for: COVID-19 Pandemic and Patients with Rare Inherited Metabolic Disorders and Rare Autoinflammatory Diseases—Organizational Challenges from the Point of View of Healthcare Providers
Source: MDPI journal article supplement (doi:10.3390/jcm10214862), 2021-10-22
Supplement: s1 [file s1]

## COVID-19 and rare metabolic diseases -PART II

1. Has COVID pandemic caused delay in diagnostics new patients with rare metabolic diseases.

YES

NO

If yes

2. Please mark which rare diseases were diagnosed and how many subjects

|                                             | Disease                | All patients in the Clinic |                  |
|---------------------------------------------|------------------------|----------------------------|------------------|
|                                             |                        | Pediatric                  | Adult (>18 y.o.) |
| 1                                           | Gaucher disease t. I   |                            |                  |
| 2                                           | Gaucher disease t. III |                            |                  |
| 3                                           | MPS I                  |                            |                  |
| 4                                           | MPS II                 |                            |                  |
| 5                                           | MPS VI                 |                            |                  |
| 6                                           | Pompe disease          |                            |                  |
| 7                                           | Fabry disease          |                            |                  |
| 8                                           | Hyperhomocysteinemias  |                            |                  |
| 9                                           | Tyrosinemia            |                            |                  |
| IMDs requiring L-carnitine supplementation: |                        |                            |                  |
| 11                                          | 3MCC/MCG               |                            |                  |
| 12                                          | GA1                    |                            |                  |
| 13                                          | IVA                    |                            |                  |
| 14                                          | MMA                    |                            |                  |
| 15                                          | PA                     |                            |                  |
| 16                                          | LCHAD                  |                            |                  |
| 17                                          | VLCAD                  |                            |                  |
| 18                                          | MTP, CACT, CPT2        |                            |                  |
| 19                                          | MCAD                   |                            |                  |
| 20                                          | MADD                   |                            |                  |

|    |                           |  |  |
|----|---------------------------|--|--|
| 21 | CUD                       |  |  |
| 22 | Autoinflammatory diseases |  |  |

3. What was the cause in delay of diagnostics
- Fear of infection at a hospital – didn't come for an appointment
  - Appointment cancelation by management of the facility
  - Procedural causes – prolonged material flow to the laboratory, extended period of gene marking
  - Personel illness
  - Patient's infection
  - Quarantane due to COV2 exposure
  - Other – please specify [open question]
4. How many new patients per year are diagnosed at your facility.

|                                     | Before COVID-19 pandemic |                  | During COIVD- 19 pandemic |                  |
|-------------------------------------|--------------------------|------------------|---------------------------|------------------|
|                                     | Pediatric                | Adult (>18 y.o.) | Pediatric                 | Adult (>18 y.o.) |
| Newly diagnosed patients            |                          |                  |                           |                  |
| Transferred patients with diagnosis |                          |                  |                           |                  |

5. Has COVID-19 pandemic delayed inclusion to the treatment of patient with rare metabolic disease

YES

NO

If yes

1. Mark which diseases and how many subjects were concerned

|   | Disease                | All patients in the Clinic |                  |
|---|------------------------|----------------------------|------------------|
|   |                        | Pediatric                  | Adult (>18 y.o.) |
| 1 | Gaucher disease t. I   |                            |                  |
| 2 | Gaucher disease t. III |                            |                  |
| 3 | MPS I                  |                            |                  |
| 4 | MPS II                 |                            |                  |

|                                             |                           |  |  |
|---------------------------------------------|---------------------------|--|--|
| 5                                           | MPS VI                    |  |  |
| 6                                           | Pompe disease             |  |  |
| 7                                           | Fabry disease             |  |  |
| 8                                           | Hyperhomocysteinemias     |  |  |
| 9                                           | Tyrosinemia               |  |  |
| IMDs requiring L-carnitine supplementation: |                           |  |  |
| 11                                          | 3MCC/MCG                  |  |  |
| 12                                          | GA1                       |  |  |
| 13                                          | IVA                       |  |  |
| 14                                          | MMA                       |  |  |
| 15                                          | PA                        |  |  |
| 16                                          | LCHAD                     |  |  |
| 17                                          | VLCAD                     |  |  |
| 18                                          | MTP, CACT, CPT2           |  |  |
| 19                                          | MCAD                      |  |  |
| 20                                          | MADD                      |  |  |
| 21                                          | CUD                       |  |  |
| 22                                          | Autoinflammatory diseases |  |  |

6. What was the cause of delay of inclusion to the treatment

- a. Fear of infection at a hospital – didn't come for an appointment
- b. Cancellation of hospitalization by hospital
- c. Procedural causes
  - i. prolonged documentation flow,
  - ii. extension of gene/biochemic marking
  - iii. no possibility of appointment with a specialist
  - iv. limited access to imaging and functional examination (MRI, USG, spirometry, etc.)

- v. other [open question]
- d. Personel infection
- e. Patient infection
- f. Quarantine after SarsCov 2 exposure
- g. Other [open question]

7. How many patients with rare metabolic diseases, not only included in treatment, are cared for by your facility

|   |                                                                        | Patients  |                 |
|---|------------------------------------------------------------------------|-----------|-----------------|
|   |                                                                        | Pediatric | Adults >18 y.o. |
| 1 | Lysosomal storage diseases (LSD)                                       |           |                 |
| 2 | Amino and organic-acid related disorders (AOA)                         |           |                 |
| 3 | Congenital disorders of glycosylation (CDG)                            |           |                 |
| 4 | Carbohydrate, fatty acid oxidation and ketone bodies disorders (C-FAO) |           |                 |
| 5 | Mitochondrial oxidative phosphorylation disorders                      |           |                 |
| 6 | Other [which one, open question]                                       |           |                 |

8. Was there a deterioration of the IMD/AD symphoms of patients treated in your facility during COVID 19 pandemic.

YES

NO

If yes

9. Please mark which diseases and how many patients were concerned

|   |                                                                        | Patients  |                 |
|---|------------------------------------------------------------------------|-----------|-----------------|
|   |                                                                        | Pediatric | Adults >18 y.o. |
| 1 | Lysosomal storage diseases (LSD)                                       |           |                 |
| 2 | Amino and organic-acid related disorders (AOA)                         |           |                 |
| 3 | Congenital disorders of glycosylation (CDG)                            |           |                 |
| 4 | Carbohydrate, fatty acid oxidation and ketone bodies disorders (C-FAO) |           |                 |
| 5 | Mitochondrial oxidative phosphorylation disorders                      |           |                 |
| 6 | Other [which one, open question]                                       |           |                 |

10. What was the course of exacerbation.

|   | Diagnosis | The need of hospitalization on the ward dedicated for IMD/AD [YES/NO] | The need of hospitalization on different ward [YES/NO, name of the ward] | Ambulatory treatment [YES/NO] | IMD/AD symptoms similar to those before sars-cov-2 infection [YES/NO] | The worsening of the symptoms of IMD/AD [YES/NO] | The death of the patient [YES/NO] |
|---|-----------|-----------------------------------------------------------------------|--------------------------------------------------------------------------|-------------------------------|-----------------------------------------------------------------------|--------------------------------------------------|-----------------------------------|
| 1 |           |                                                                       |                                                                          |                               |                                                                       |                                                  |                                   |
| 2 |           |                                                                       |                                                                          |                               |                                                                       |                                                  |                                   |
| 3 |           |                                                                       |                                                                          |                               |                                                                       |                                                  |                                   |
| 4 |           |                                                                       |                                                                          |                               |                                                                       |                                                  |                                   |

11. Has the need of hospitalization at other facility than the leading one was due to (check all that apply)

- Change of main department to COVID (+) department
- Shortage of space at main department
- State of a patient requiring specialized assistance (ICU, cardiology, etc)
- Transportation of the patient to a ICU that is the nearest to patient habitation that is outside of the main hospital
- Other [ open question]

12. What was the cause of exacerbation/progression of IMD/AD

|   | Diagnosis | Sars-cov-2 infection | Other infection (which one) | Other reason (please describe) |
|---|-----------|----------------------|-----------------------------|--------------------------------|
| 1 |           |                      |                             |                                |
| 2 |           |                      |                             |                                |
| 3 |           |                      |                             |                                |
| 4 |           |                      |                             |                                |
