# Supplementary material for: COVID-19 Pandemic and Patients with Rare Inherited Metabolic Disorders and Rare Autoinflammatory Diseases—Organizational Challenges from the Point of View of Healthcare Providers
Source: MDPI journal article supplement (doi:10.3390/jcm10214862), 2021-10-22
Supplement: s1 [file s1]

## COVID-19 and rare metabolic diseases -PART I

1. How many patients with a rare metabolic diseases are treated in your Clinic? [open question]
2. How many of those are: pediatric[open question], adult [open question]
3. Please indicate how many patients with a given disease are under the care of your Clinic and how many suffered from SARS-COV-2 infection

|                                             | Disease                   | All patients in the Clinic |                  | Patients after SARS-COV-1 infection |                 |
|---------------------------------------------|---------------------------|----------------------------|------------------|-------------------------------------|-----------------|
|                                             |                           | pediatric                  | Adult (>18 y.o.) | dzieci                              | dorośli >18 lat |
| 1                                           | Gaucher disease t. I      |                            |                  |                                     |                 |
| 2                                           | Gaucher disease t. III    |                            |                  |                                     |                 |
| 3                                           | MPS I                     |                            |                  |                                     |                 |
| 4                                           | MPS II                    |                            |                  |                                     |                 |
| 5                                           | MPS VI                    |                            |                  |                                     |                 |
| 6                                           | Pompe disease             |                            |                  |                                     |                 |
| 7                                           | Fabry disease             |                            |                  |                                     |                 |
| 8                                           | Hyperhomocysteinemias     |                            |                  |                                     |                 |
| 9                                           | Tyrosinemia               |                            |                  |                                     |                 |
| IMDs requiring L-carnitine supplementation: |                           |                            |                  |                                     |                 |
| 11                                          | 3MCC/MCG                  |                            |                  |                                     |                 |
| 12                                          | GA1                       |                            |                  |                                     |                 |
| 13                                          | IVA                       |                            |                  |                                     |                 |
| 14                                          | MMA                       |                            |                  |                                     |                 |
| 15                                          | PA                        |                            |                  |                                     |                 |
| 16                                          | LCHAD                     |                            |                  |                                     |                 |
| 17                                          | VLCAD                     |                            |                  |                                     |                 |
| 18                                          | MTP, CACT, CPT2           |                            |                  |                                     |                 |
| 19                                          | MCAD                      |                            |                  |                                     |                 |
| 20                                          | MADD                      |                            |                  |                                     |                 |
| 21                                          | CUD                       |                            |                  |                                     |                 |
| 22                                          | Autoinflammatory diseases |                            |                  |                                     |                 |

4. How many Patients in your Clinic are included into therapeutic programs with reimbursed treatment [open question]

5. Has your Clinic been converted into COVID-19 unit during pandemic?

YES                      NO

6. Did patients regularly visited your Clinic during COVID-19 pandemic (also the metabolic diseases outpatient clinic)?

YES            NO

7. If NOT, what was the reason for the absence?

- a. Patients' fear of infection in the hospital
- b. Cancellation of the appointment by health care providers
- c. SARS-COV-2 infection- medical staff
- d. SARS-COV-2 infection- patient
- e. Quarantine after COVID-19 exposure- patient
- f. Other - please specify [open question]

8. Has the telemedicine been launched as part of the patient care?

YES NO

9. Did the Patients use this contact option?

YES NO

10. If YES, what was the reason for choosing this form of visit (you can choose several options).

- a. Patients' fear of infection in the hospital
- b. Cancellation of the appointment by health care providers
- c. SARS-COV-2 infection- medical staff
- d. SARS-COV-2 infection- patient
- e. Quarantine after COVID-19 exposure- patient
- f. Other - please specify [open question]

12. Was there a delay/ disruption in intravenous treatment (f.e ERT) ?

YES NO

If YES, how long? [open question]

13. What was the cause of the interruption / delay?

- a. Patients' fear of infection in the hospital
- b. Cancellation of the appointment by health care providers

- c. Delay in processing of documents
- d. SARS-COV-2 infection- medical staff
- d. SARS-COV-2 infection- patient
- e. Quarantine after COVID-19 exposure- patient
- f. Other - please specify [open question]

14. Was worsening of the symptoms of the main disease observed?

YES NO

15. In the case of diseases in which drug programs include oral medications in addition to intravenous infusions - were there any cases of switch;

YES NOT APPLICABLE

If YES, with what effect? [open question]

16. What were the reasons for switching from intravenous to p.o. (you can choose several answer options)

- a. Decision of the physician
- b. Patient's request
- c. A more convenient model of therapy
- d. Safety for the patient [open question]
- e. Allergic reaction to previously used medication
- f. Other - please specify

17. Has any of the patients with rare metabolic diseases/autoinflammatory diseases a Sars COV2 infection?

YES NO

18. What were the symptoms during the infection - please complete an individual questionnaire:

| The symptoms     | YES | NO |
|------------------|-----|----|
| Fever            |     |    |
| Dry cough        |     |    |
| Rhinitis         |     |    |
| Sore throat      |     |    |
| General weakness |     |    |
| Muscle pain      |     |    |

|                                                                                                        |  |  |
|--------------------------------------------------------------------------------------------------------|--|--|
| Joints pain                                                                                            |  |  |
| Conjunctivitis                                                                                         |  |  |
| Headache                                                                                               |  |  |
| Diarorhea                                                                                              |  |  |
| Loss of taste or pain                                                                                  |  |  |
| Skin rush of hands and feet                                                                            |  |  |
| Other (please specify)                                                                                 |  |  |
| <b>Has any of those symptoms occurred?</b>                                                             |  |  |
| Shortness of breath or dyspnea                                                                         |  |  |
| Saturation decrease                                                                                    |  |  |
| Chest pain                                                                                             |  |  |
| Other (please specify)                                                                                 |  |  |
| <b>COVID-19 treatment</b>                                                                              |  |  |
| Has the patient been hospitalized?                                                                     |  |  |
| What was the COVID-19 treatment? [open question]                                                       |  |  |
| <b>The treatment of main disease</b>                                                                   |  |  |
| Was the patient treated with intravenous therapy (f.e ERT)?                                            |  |  |
| Was there any delay/disruption in treatment?<br>If YES, how long? [open question]                      |  |  |
| Did you observed the worsening of the symptoms of main disease? Describe the symptoms. [open question] |  |  |
